1  
2 **Long-term fasting in the anadromous Arctic charr is associated with down-**  
3 **regulation of metabolic enzyme activity and up-regulation of leptin A1 and**  
4 **SOCS expression in the liver.**

5  
6  
7 **Short title:** Arctic charr leptin and liver metabolism

8  
9 **Even Hjalmar Jørgensen<sup>1†</sup>, Mads Martinsen<sup>1</sup>, Vidar Strøm<sup>1</sup>, Kristin Elisa Ruud Hansen<sup>1</sup>,**  
10 **Chandra Sekhar Ravuri<sup>1</sup>, Ningping Gong<sup>2</sup>, Malcolm Jobling<sup>1</sup>.**

11  
12 <sup>1</sup>*Faculty of Biosciences, Fisheries and Economy, Department of Arctic and Marine Biology,*  
13 *University of Tromsø, N-9037 Tromsø, Norway*

14 <sup>2</sup>*Fish Endocrinology Laboratory, Department of Zoology/Zoophysiology, University of*  
15 *Gothenburg, Box. 463, S-40530 Göteborg, Sweden.*

16  
17  
18  
19 **Key words:** *Salvelinus alpinus*, seasonal fasting, emaciation, liver metabolism, leptin, SOCS,  
20 IGF-I.

21  
22  
23 **†Corresponding author:**

24  
25 Dr. Even H Jørgensen

26  
27 <sup>1</sup>Faculty of Biosciences, Fisheries and Economy, Department of Arctic and Marine Biology,  
28 University of Tromsø, N-9037 Tromsø, Norway

29 Tel: (47) 77 64 67 91; Fax: (47) 77 64 60 20; e-mail: [even.jorgensen@uit.no](mailto:even.jorgensen@uit.no)

30  
31  
32 **Grants:** Tromsø Research Foundation, University of Tromsø.

33  
34  
35 **Disclosure statement:** The authors have nothing to disclose

36

37 **Abstract**

38 The life-strategy of the anadromous Arctic charr (*Salvelinus alpinus*) includes several months of  
39 voluntary fasting during overwintering in fresh water leading to emaciation prior to seawater  
40 migration in spring. In this study we compared changes in condition, substrate utilization and  
41 liver metabolism between captive anadromous charr subjected to food-deprivation during late  
42 winter and spring, and conspecifics fed in excess. In March, 9 out of the 10 sampled fed fish had  
43 not eaten, indicating that they were in a voluntary anorexic state. In June, the fed fish were eating  
44 and all had higher body mass (BM), condition factor (CF) and adiposity than in March. In fasted  
45 fish there were only small decreases in BM, CF and adiposity between March and May, but all  
46 these parameters decreased markedly from May to June. The fasted fish were fat- and glycogen-  
47 depleted in June, had suppressed activity of hepatic enzymes involved in lipid metabolism  
48 (G6PDH and HOAD) and seemed to rely on protein-derived glucose as a major energy source.  
49 This was associated with up-regulated liver gene expression of *leptin A1*, *leptin A2*, *SOCS1*,  
50 *SOCS2* and *SOCS3*, and reduced *IGF-I* expression. In an *in vitro* study with liver slices it was  
51 shown that recombinant rainbow trout leptin stimulated *SOCS1* and *SOCS3* expression, but not  
52 *SOCS2*, *IGF-I* or genes of enzymes involved in lipid (*G6PDH*) and amino acid (*AspAT*)  
53 metabolism. It is concluded that liver leptin interacts with SOCS in a paracrine fashion to  
54 suppress lipolytic pathways and depress metabolism when fat stores are depleted.

55

56

## 57 1. Introduction

58 The anadromous life-strategy of Arctic charr (*Salvelinus alpinus*) is characterized by substantial  
59 seasonal changes in food intake, growth and adiposity. Most of the annual growth and energy  
60 accumulation occurs during a short summer seawater residence, whereas overwintering in fresh  
61 water is characterized by anorexia and depletion of energy reserves (Dutil, 1986; Boivin and  
62 Power, 1990; Jørgensen et al., 1997; Jobling et al., 1998). Captive offspring of anadromous  
63 Arctic charr also exhibit pronounced seasonal changes in food intake and growth when held at  
64 constant temperature and given food in excess (Tveiten et al., 1998), showing that the seasonal  
65 cycle of food intake and growth is under physiological control. In captive offspring of  
66 anadromous charr feeding commences in May (Tveiten et al., 1996; Bottengård and Jørgensen,  
67 2008; Aarseth et al., 2010). In wild anadromous charr, appetite seems to return in early May  
68 (Aas-Hansen et al., 2005), whereas seaward migration takes place 3 to 4 weeks later (Aas-Hansen  
69 et al., 2005; Jensen et al., 2012). During the pre-migratory period the fish apparently find little  
70 food, and their condition factor continues to decrease until the time of downstream migration,  
71 when it may be as low as 0.70 (Nilssen et al., 1997; Aas-Hansen et al., 2005). Hence, the  
72 anadromous life-strategy of Arctic charr incorporates a prolonged, voluntary anorexia with  
73 emaciation, indicating high tolerance to food deprivation. As such, the anadromous charr  
74 represents an interesting model for investigation of mechanisms associated with long-term  
75 regulation of appetite and energy homeostasis.

76 Since the first identification of a gene encoding for a cDNA homologue to mammalian  
77 leptin (Lep) in pufferfish (*Takifugu rubripes*) (Kurokawa et al., 2005), *Lep* genes have been  
78 identified in many fish species, including the Arctic charr (Frøiland et al., 2010). In contrast to  
79 mammals, in which Lep is produced mainly in adipose tissue (Masuzaki et al., 1995), Lep is  
80 produced in numerous tissues in fish, including the liver (Wong et al., 2007; Kurokawa and

81 Murashita, 2009; Rønnestad et al., 2010; Tinoco et al., 2012; Trombley et al., 2012). Hepatic  
82 *LepA1* and *LepA2* expression increased towards the end of a 7 week period of feed restriction in  
83 Atlantic salmon (*Salmo salar*) (Trombley et al., 2012) and during the latter part of a 75 days  
84 period of feed deprivation in Arctic charr (Frøiland et al., 2012). Increased liver *LepA1*  
85 expression was observed without any change in plasma Lep concentrations (Frøiland et al., 2012;  
86 Kling et al., 2012), indicating a paracrine role for Lep in nutrient processing and regulation of  
87 endogenous energy reserves in the liver. A paracrine role for Lep in the fish liver is also  
88 supported by the presence of the *Lep receptor (LepR)* gene in this organ in several fish species  
89 (Liu et al., 2010; Rønnestad et al., 2010; Tinoco et al., 2012; Trombley et al., 2012).

90 We have studied the metabolic responses of the liver to long-term fasting in the Arctic  
91 charr, and have investigated whether Lep and the suppressor of cytokine stimulation (SOCS) may  
92 play a role in regulating these responses. Examination of *SOCS* gene expression was included in  
93 the study because SOCS is known to modulate the signalling of hormones regulating energy  
94 homeostasis such as growth hormone (GH) and Lep in mammals (Fujimoto and Naka, 2003).

95

## 96 **2. Material and Methods**

97

### 98 *2.1. Experiment 1. Fish, experimental set-up and sampling*

99 The experiment was carried out at Tromsø Aquaculture Research Station (TARS), Tromsø,  
100 Norway (69°N), with hatchery reared offspring of anadromous Arctic charr derived from a  
101 broodstock captured in Lake Vårfluesjøen, Svalbard (79°N) in 1990. The eggs hatched in winter  
102 2008 and juveniles were held in fresh water at 6°C under continuous light until July 2009, and  
103 thereafter at ambient water temperature and natural light (transparent roof) conditions until the  
104 start of the experiment. On March 8 and 9, 2010, a total of 360 individually tagged (Floy FTF-69

105 fingerling tags; MGF, Seattle) fish with an average body mass of 146 g were taken from a stock  
106 tank, anaesthetised in Benzocaine (60 ppm) and randomly distributed among 4, 300 litre circular  
107 tanks. The tanks were subjected to simulated natural light conditions (69°N) and were supplied  
108 with fresh water at ca. 5°C (ranging between 4.7 and 6.3°C). The fish were provided with  
109 commercial dry-pellet feed (Nutra Parr; Skretting, Stavanger, Norway) in excess until March 24,  
110 after which the fish in two tanks were feed-deprived until the end of the experiment in June (FU  
111 fish). The fish in the other two tanks continued to be fed in excess throughout the experiment (FF  
112 fish). The experiment was terminated on June 17, when the condition factor  $[(\text{Mass}/\text{Length}^3) \times 100]$   
113 of the fasted fish was approaching that (0.70) of wild, anadromous Arctic charr when they  
114 descend to the sea.

115 On March 25, May 6 and June 17, a total of 5 randomly selected fish were quickly netted  
116 from each tank and killed with an overdose of Benzocaine (120 ppm). Blood was collected from  
117 the caudal vein using 2-ml, lithium-heparinized (30 USP units) vacutainers and held on ice until  
118 plasma was separated by centrifugation ( $6000 \times g$ , for 10 min). Plasma was stored at -80°C until  
119 analyses of cortisol and glucose concentrations were carried out. Thereafter, body mass (BM; g)  
120 and fork length (FL; cm) of the fish were measured before each fish was dissected. Liver weights  
121 were noted and three small pieces were removed. One piece was put in a tube with RNAlater  
122 (Ambion®, Life Technologies), and stored at -20°C until analysis of *LepA1*, *LepA2*, *IGF-I* and  
123 *SOCS 1-3* gene expressions, and the other two were wrapped in aluminium foil and frozen at -  
124 80°C for later analysis of glycogen and enzyme activities. The fish were then examined for feed  
125 in the stomach, sex and maturity status, before the body was wrapped in aluminium foil and  
126 stored at - 80 °C for later analysis of proximate chemical composition. After the sampling in  
127 March and May the remainder of the fish in each tank were anaesthetized in benzocaine for body  
128 mass and length measurement.

129 For the FF fish, 1 out of the 10 fish sampled in March had eaten and in May, 4 fish had  
130 eaten, whereas 6 had empty stomachs. In June, 7 out of the 10 sampled fish had well-filled  
131 stomachs. The FF fish were intended to simulate the seasonal feeding cycle of wild, anadromous  
132 Arctic charr, so the fish that was recorded as eating in March, and those that were anorexic in  
133 June, were excluded from the analyses. The FF fish sampled in May were also excluded, due to  
134 the low number of feeding fish and the heterogeneity of feeding behaviour within the group.

135 The experiment was approved by the Norwegian Committee on Ethics in Animal  
136 Experimentation (id. 2442).

137

## 138 *2.2. Plasma cortisol and glucose, and liver glycogen and enzyme analyses*

139 Plasma cortisol concentration was determined by radioimmunoassay (RIA), using an established  
140 protocol (Schultz, 1985) validated for Arctic charr (Tveiten et al., 2010). The detection limit for  
141 the assay was  $3.0 \text{ ng} \cdot \text{ml}^{-1}$ . Plasma glucose concentration, given as nM, was measured  
142 spectrophotometrically using a commercial enzymatic kit (Randox HL 1611; Crumlin, UK).  
143 Liver glycogen concentration was determined by glucose measurements, using the same kit as for  
144 plasma glucose measurements, before and after hydrolysis of glycogen with amyloglucosidase  
145 (Keppler and Decker, 1974) and expressed as  $\mu\text{mol} \cdot \text{g protein}^{-1}$ . Liver enzyme activities were  
146 measured as described in Aas-Hansen et al. (2005) and expressed as  $\mu\text{mol} \cdot \text{min}^{-1} \cdot \text{g protein}^{-1}$ .  
147 Enzyme activities determined were alanine aminotransferase (AlaAT) (EC 2.6.1.2), aspartate  
148 aminotransferase (AspAT) (EC 2.6.1.1), glucose-6-phosphate dehydrogenase (G6PDH) (EC  
149 1.1.1.49), 3-hydroxyacylcoenzyme A dehydrogenase (HOAD) (EC 1.1.1.35), lactate  
150 dehydrogenase (LDH) (EC 1.1.1.27), phosphoenolpyruvate carboxykinase (PEPCK) (EC  
151 4.1.1.32), and pyruvate kinase (PK) (EC 2.7.1.40).

152

153 *2.3. Whole body proximate composition analysis*

154 Whole fish were homogenized by passing them three times through a mincer (Sirman TC22F,  
155 Marsango, Italy). Duplicate samples of ca. 10 g homogenate were weighed ( $\pm 0.1$  g), dried for 24  
156 h at 105°C and then re-weighed to calculate water content. Fat extraction was carried out as  
157 described by Johansen et al. (2002), using a Behrotest extraction system (Behr Labor-technik,  
158 Düsseldorf, Germany) and ether (Merck, Darmstadt, Germany) as the solvent. Following fat  
159 extraction, the extraction thimbles with tissue samples were dried and weighed. Fat content was  
160 calculated as weight loss during extraction, and fat concentration was calculated in relation to  
161 sample wet weight and expressed as a percentage of body mass. Finally, samples were ashed at  
162 500°C for 12 h to estimate the percentage of ash in the sample. Protein was estimated as the  
163 difference between the dry sample mass and the combined masses of fat and ash, under the  
164 assumption of negligible carbohydrate content. The full dataset for these results and calculations  
165 are given in Supporting information (Table 2).

166

167 *2.4. Experiment 2. In vitro study of liver leptin treatment.*

168 The *in vitro* study was performed in January 2013, with liver slices obtained from one Arctic  
169 charr (345 gram) of the same strain as those used in Experiment 1. The fish were not eating at the  
170 time of sampling, but had a higher condition factor (1.06) than the fasted fish used in Experiment  
171 1. The fish was killed by a sharp blow to the head and then decapitated. Thereafter the fish was  
172 dissected and the liver was perfused with ice-cold PBS via the hepatic portal vein until it turned  
173 white. The liver was then excised and placed in ice-cold L15 medium. A liver piece of ca. 0.7 x  
174 0.7 x 0.5 cm. was then taken and sliced (250  $\mu$ m thickness) with a Leica VT1200 (Leica  
175 Microsystems GmbH, Germany).

176           Nine liver slices were incubated individually under gentle shaking for 24 h in a 24-well  
177 plate at 5°C. Three wells contained 0.5 ml L15 medium with recombinant rainbow trout Lep  
178 dissolved in 5 µl PBS, resulting in a Lep concentration in the medium of 50 nM (PBS + Lep).  
179 The choice of concentration was based on results from treatment of grass carp  
180 (*Ctenopharyngodon idellus*) hepatocytes with recombinant grass carp leptin (Lu et al., 2012). The  
181 recombinant rainbow trout leptin with proved bioactivity was produced by the method described  
182 by Murashita et al (2008). The purity of produced leptin was around 60% determined by SDS-  
183 PAGE. Three wells contained 0.5 ml L15 medium added 0.5 µl PBS (PBS) and the final 3 wells  
184 contained 0.5 ml L15 medium alone (Untreated). After 24 h the slices were put in RNAlater and  
185 stored at -20°C until analysis of *SOCS1*, *SOCS2*, *SOCS3*, *G6PDH*, *AlaAT* and *IGF-I* gene  
186 expressions. The choice of metabolic enzymes were done in order to investigate representatives  
187 of lipid metabolism (G6PDH) and gluconeogenesis (AspAT) which decreased and remained  
188 unchanged with fasting, respectively. Liver slice viability was estimated by lactate  
189 dehydrogenase (LDH; EC 1.1.1.27) leakage, using a Cytotoxicity Detection Kit (LDH) from  
190 Roche (Roche Diagnostics GmbH, 68298 Mannerheim, Germany) and a Spetramax plus  
191 spectrophotometer (Molecular devices, LLC, US) set at 490 nm.

192  
193 *2.5. Real-time quantitative PCR of liver LepA1, LepA2, IGF-I, SOCS1, 2 and 3, AspAT and*  
194 *G6PDH mRNA expression.*

195 Reverse transcription of total RNA was performed using QuantiTect Reverse Transcription Kit  
196 (QIAGEN, Hilden, Germany) with 1000 ng of RNA per 20 µl cDNA reaction according to the  
197 manufacturer's instructions. This kit includes an initial step of gDNA removal, and a -RT test on  
198 a selection of samples showed that this was effective. Quantitative real-time PCR (qPCR) was  
199 performed, using the comparative C<sub>T</sub> method (Applied Biosystems, Warrington, UK), on an ABI



200 7500 Fast Real-Time PCR System. For real-time estimations, cDNA corresponding to 25 ng  
201 RNA was amplified for 40 cycles in a 20  $\mu$ l PCR mix (Fast SYBR<sup>®</sup> Green Master Mix (Applied  
202 Biosystems, Fast City, CA 94404) containing a final concentration of 500 nM of each primer  
203 (PrimerDesign Ltd, The Mill Yard, Southampton, United Kingdom, SO16 0AJ; Table 1). Cycling  
204 conditions: 95°C for 20 sec, 40 cycles at 95°C for 3 sec, and 60°C for 30 sec including melt curve  
205 analysis. Duplicate PCR analyses were performed on each cDNA sample, the absence of gDNA  
206 was confirmed by performing a no reverse transcriptase control for every RNA sample, and  
207 absence of contamination was confirmed by including a no template control in every run. The  
208  $\Delta\Delta$ Ct method (Livak and Schmittgen, 2001) was used to determine the relative amount of target  
209 gene, normalizing against the average expression of the two reference genes *EF1 $\alpha$*  and  *$\beta$ -Actin* in  
210 Experiment 1 and against *EF1 $\alpha$*  in Experiment 2. The primer sequences used for RTqPCR  
211 analyses are listed in Table 1.

212

### 213 2.6. Data treatment and statistics

214 All data from Experiment 1 are presented as means  $\pm$  standard error of the mean (s.e.m.). *LepA1*  
215 and *LepA2* expression are given as relative values in comparison with the mean liver *LepA1*  
216 expression in FF fish in March. *SOCS* genes expression are given relative to the mean *SOCS1*  
217 expression in FF fish in March, and *IGF-I* gene expression relative to the mean liver *IGF-I*  
218 expression in FF fish in March. Only values normalized against *EF1 $\alpha$*  are given for the *in vitro*  
219 data. Condition factor (CF) and hepatosomatic index (HSI) were calculated as  $[(BM \cdot FL^{-3}) \cdot 100]$   
220 and  $[(liver\ mass \cdot 100) \cdot BM^{-1}]$ , respectively. The weights of body fat and protein present in the  
221 fish were calculated by combining the body fat and protein data for the fish sampled in March,  
222 May and June, with those relating to changes in BM over time for the fish sampled in May (only  
223 FU fish) and June. All data were log-transformed before statistical analyses, with 1 being added

224 to the condition factor, liver HOAD, PEPCK, PK enzyme activity and liver *Lep*, *IGF-I* and *SOCS*  
225 expression data in order to achieve positive log-numbers. A two-way Analysis of Variance test  
226 was used to reveal possible effects of time and treatment (replicates pooled) on BM, CF,  
227 percentage body fat and protein, HSI, plasma cortisol and glucose concentrations, liver glycogen  
228 concentration and enzyme activities and liver *LepA1*, *LepA2*, *SOCS1-3* and *IGF-I* gene  
229 expressions. A post-hoc (Tukey HSD) test was used to reveal where significant differences  
230 occurred. Possible effects of *Lep* on the mRNA expression of liver *SOCS1-3*, *AspAT*, *G6PDH*  
231 and *IGF-I* genes in the *in vitro* study were tested using a non-parametric Kruskal-Wallis test.  
232 Results were considered significant when probability level was lower than, or equal to, 0.05.

233

### 234 3. Results

235

#### 236 3.1. Experiment 1.

237 BM did not differ between treatments in March (Fig. 1A), but in June FF fish had a much higher  
238 BM than FU fish ( $p < 0.001$ ). A similar pattern was seen for CF, which did not differ between the  
239 two treatment groups in March, but was much higher ( $p < 0.001$ ) in FF than in FU fish in June  
240 (Fig. 1B). The FF fish sampled in June had increased markedly in BM ( $p < 0.01$ ) and CF ( $p <$   
241  $0.01$ ) from March to June (Supporting information, Table 1). There was no change in BM  
242 between March and May in FU fish sampled in March, while those sampled in June had only a  
243 minor, insignificant decline in BM from March to June (from  $155.4 \pm 9.3$  g to  $138.1 \pm 7.5$  g). The  
244 latter fish decreased in CF ( $p < 0.001$ ) from  $0.88 \pm 0.01$  to  $0.75 \pm 0.01$  (Supporting information,  
245 Table 1).

246 There were no differences in the percentage of body protein between FF and FU fish  
247 sampled in March and June. The percentage of total body protein did not differ between FU fish

248 sampled in March and May, but was slightly lower ( $p < 0.05$ ) in June than in March and May  
249 (Fig. 1C). There were no differences in the percentage of total body protein in FF fish sampled in  
250 March and June. The percentage of total body fat did not differ significantly between FF and FU  
251 fish in March (Fig. 1D). In FU fish the percentage of total body fat did not differ significantly  
252 between March and May, but was much lower ( $p < 0.01$ ) in June than in May. In FF fish the  
253 proportion of body fat was lower in March ( $4.5 \pm 0.5$  %) than in June ( $10.4 \pm 1.5$  %) and was  
254 higher in FF fish than in FU fish ( $1.2 \pm 0.4$  %) in June ( $p < 0.001$ ). In mass terms, there was an  
255 almost total depletion of body fat in FU fish during the course of the experiment, and a greater  
256 loss of protein between May and June than between March and May (Fig. 2 B). In FF fish both  
257 total body fat and protein content were much higher in June than in March (Fig. 2A).

258 Plasma cortisol concentration did not differ between FF and FU fish in March and June  
259 (Fig. 1E), but was higher in FU fish in May than in March ( $p < 0.05$ ). The same trend was seen  
260 for plasma glucose concentrations (Fig. 1F), which also showed a transient increase in FU fish  
261 from March to May ( $p < 0.05$ ).

262 Liver *LepA1* mRNA expression did not differ between FF and FU fish in March (Fig. 3A)  
263 and for FF fish there was no change in expression between March and June. In FU fish there was  
264 lower expression in March than in May ( $p < 0.05$ ) and a higher expression June than in May ( $p <$   
265  $0.01$ ). In June, *LepA1* expression was markedly lower in FF fish than in FU fish ( $p < 0.05$ ). The  
266 same general pattern was seen for *LepA2* expression (Fig. 3B), which was higher in FU fish than  
267 in FF fish in June ( $p < 0.01$ ). Liver *IGF-I* mRNA expression did not differ between FF and FU  
268 fish in March. There was no difference in *IGF-I* expression for FU fish sampled in March and  
269 May (Fig. 3C), but a decrease from May to June ( $p < 0.05$ ). There was no difference in *IGF-I*  
270 expression in FF fish sampled in March and June.

271 Liver *SOCS* gene expressions are shown in Fig. 4. There were no differences between FF  
272 and FU fish in *SOCS1*, *SOCS2* and *SOCS3* in March. In FF fish *SOCS1* mRNA expression was  
273 higher in March than in June ( $p < 0.05$ ). There were no differences in *SOCS1* expression in FU  
274 fish sampled at different times, resulting in a tendency toward a higher *SOCS1* expression in FU  
275 fish than in FF fish in June ( $p = 0.062$ ). For *SOCS2*, expression was higher in FF fish sampled in  
276 March than in June ( $p < 0.001$ ), whereas the opposite was seen in FU fish ( $p < 0.001$ ). This  
277 resulted in a higher *SOCS2* expression in FU fish than in FF fish in June ( $p < 0.001$ ). *SOCS3*  
278 expression was higher in March than June in both FF ( $p < 0.01$ ) and in FU fish ( $p < 0.05$ ), with a  
279 higher expression in FU than in FF fish in June ( $p < 0.05$ ).

280 Hepatosomatic index (HSI) did not differ between FF and FU fish in March, after which  
281 there was a decrease in FU fish ( $p < 0.05$ ), and an increase in FF fish ( $p < 0.001$ ), resulting in a  
282 higher ( $p < 0.001$ ) HSI in FF than in FU fish in June (Table 2). Liver glycogen concentration  
283 (Table 2) did not differ between FF and FU fish in March, but was higher ( $p < 0.05$ ) in FF fish in  
284 June than in March and lower in FU fish in June than in both March and May ( $p < 0.001$ ). This  
285 resulted in a marked difference in liver glycogen concentrations between FF ( $28.2 \pm 4.7 \mu\text{mol} \cdot \text{g}$   
286  $\text{protein}^{-1}$ ) and FU fish ( $1.8 \pm 0.5 \mu\text{mol} \cdot \text{g protein}^{-1}$ ) in June ( $p < 0.001$ ).

287 There were no differences in any enzyme activities between FF and FU fish in March, nor  
288 between March and May in FU fish (Table 2). In FF fish, G6PDH ( $p < 0.001$ ), LDH ( $p < 0.01$ ),  
289 HOAD ( $p < 0.001$ ) and PEPCK ( $p < 0.05$ ) activities were higher in June than in March. In FU  
290 fish, G6PDH ( $p < 0.01$ ), LDH ( $p < 0.01$ ) and HOAD ( $p < 0.01$ ) activities were lower in June than  
291 in March. In June, there were higher Asp-AT, G6PDH, LDH, HOAD, PEPCK and PK activities  
292 in FF than in FU fish.

293

294 *3.2. Experiment 2.*

295 There were significantly higher *SOCS1* ( $p < 0.05$ ) and *SOCS3* ( $p < 0.05$ ) gene expressions in Lep  
296 treated liver slices (PBS + Lep) than in untreated and sham (PBS) treated slices, but no effects of  
297 Lep were seen for *SOCS2*, *G6PDH*, *AspAT* and *IGF-I* gene expressions (Fig 5).

298

#### 299 **4. Discussion**

300

301 The present study was designed to simulate the overwintering fast in wild, anadromous Arctic  
302 charr and the emaciation experienced by these fish during the latter part of their overwintering in  
303 fresh water. Since there were similar CFs in the fish used in the present study (Fig. 1B) as in  
304 those sampled in the study on wild anadromous charr by Aas-Hansen et al. (2005) in which CF  
305 decreased from 0.84 in April to 0.77 in June, we consider this objective to have been achieved. In  
306 our study, only one fish sampled in March had food in its stomach, despite access to food,  
307 indicating that the fish were in a voluntary, anorexic state. Some FF fish had consumed food  
308 when sampled on May 6 (see Material and Methods), which agrees with previous findings of a  
309 return of appetite in May in both captive, anadromous Arctic charr (Tveiten et al., 1996;  
310 Bottengård and Jørgensen, 2008; Aarseth et al., 2010) and in their wild conspecifics (Aas-Hansen  
311 et al., 2005).

312

##### 313 *4.1. Metabolic responses to fasting*

314 In FU fish fasting resulted in a decrease in BM, CF, body fat and protein, particularly between  
315 the samplings in May and June, whereas there were increases in BM, CF, body fat and protein in  
316 FF fish between March and June (Figs. 1 A,B,D; 2). The low percentage ( $1.2 \pm 0.4$  %) and low  
317 absolute amount (Fig. 2) of body fat in FU fish in June indicates that stored fat was severely  
318 depleted at this time. In a previous study plasma triglyceride concentration was also found to

319 decrease in anadromous Arctic charr deprived of food during late spring/early summer,  
320 concomitant with an increase in plasma glucose concentration (Frøiland et al., 2012). Thus it  
321 seems that the energy needed during the latter part of overwintering, and migration, must be  
322 taken from the body protein store in the anadromous Arctic charr. This conclusion is supported  
323 by the reduction in body protein observed in the FU fish from May to June (Fig. 2).

324 Prolonged fasting in fish is generally associated with reduced plasma glucose, HSI, liver  
325 glycogen and liver metabolic capacity (Navarro et al., 1992; Foster and Moon, 1991; Bastrop et  
326 al., 1992; Navarro and Gutierrez, 1995). The lack of any large change in these parameters in FU  
327 fish between March and May (Fig. 1 F; Table 2), indicates that physiological responses may  
328 differ between voluntarily fasting fish and fish subjected to enforced feed deprivation. The  
329 reduction in liver glycogen and liver enzyme activities from May to June in FU fish (Table 2)  
330 support the notion that these fish were voluntarily anorexic until May, and that they subsequently  
331 experienced starvation stress in the absence of food. The reduced metabolic capacity of the liver,  
332 together with the depletion of glycogen in FU fish from May onwards indicates that they  
333 responded by entering a state of metabolic depression, i.e. reduced metabolism under adverse  
334 environmental conditions (Guppy and Withers, 1999). Nevertheless, FU fish had plasma glucose  
335 concentrations similar to those of FF fish (Fig 1 F). This glucose was probably derived from  
336 protein, as evidenced from the decrease in the body protein store from May to June (Fig. 2 B) and  
337 the maintained activity of enzymes involved in gluconeogenesis and amino acid catabolism  
338 (PEPCK and AlaAT; Table 2). In support of this, FU fish had plasma cortisol concentrations  
339 similar to those of FF fish at the end of the experiment in June (Fig. 1E), in accordance with the  
340 accepted gluconeogenetic action of this hormone (Mommsen et al., 1999). The maintenance of a  
341 high *de novo* glucose synthesis in the liver, despite depleted liver glycogen levels, reflects the  
342 importance of this substrate during a long-term fast (Polakof et al., 2012).

343

#### 344 4.2. A role of leptin in liver metabolism?

345 The changes in liver *LepA1* and *LepA2* expression during the course of the experiment resembled  
346 those previously reported for anadromous Arctic charr (Frøiland et al., 2012); a decrease in fed  
347 fish from March to July and higher *LepA1* and *LepA2* expression in FU than in FF fish at the end  
348 of the fasting period in June. An increase in liver *Lep* expression with fasting/feed restriction has  
349 also been reported in Atlantic salmon (Rønnestad et al., 2010; Trombley et al., 2012), whereas a  
350 reduced liver *Lep* expression with fasting has been reported in goldfish (*Carassius auratus*)  
351 (Tinoco et al., 2012) and striped bass (*Morone saxatilis*) (Won et al., 2012), and no change with  
352 prolonged fasting in common carp (*Cyprinus carpio*) (Huising et al., 2006). The reason for these  
353 differences is not known but they could relate to the degree of emaciation of the fish used in the  
354 different experiments, and interspecies differences in metabolic responses to an imposed fast.

355 In the present study the activity of enzymes involved in lipid metabolism (G6PDH and  
356 HOAD) and glycolysis (PK) appeared to be inversely related to liver *LepA1* and *LepA2*  
357 expression in FU fish. In addition, the highest activity of these enzymes was recorded  
358 concurrently with low liver *LepA1* and *LepA2* expression in FF fish in June (Fig. 3 A,B; Table 2).  
359 No such interrelationships were seen for enzymes involved in amino acid metabolism and  
360 gluconeogenesis; LDH activity decreased in FU fish and increased in FF fish, but there were no  
361 changes in liver AlaAT and AspAT activities with time (Table 2). These results suggest that *Lep*  
362 may be involved in the suppression of lipolytic pathways, but *in vitro* *Lep* treatment of liver  
363 slices did not affect the gene expression of *G6PDH* (Fig. 4 D). This indicates that *Lep* was not  
364 directly responsible for the changes in liver enzyme activity.

365

#### 366 4.3. A role of SOCS in liver metabolism?

367 In mammals, SOCS1, 2 and 3 are involved in attenuating growth hormone (GH) and Lep  
368 signalling by downregulating post-receptor JAK/STAT induced gene transcription (Fujimoto and  
369 Naka, 2003). *SOCS1-3* genes have been identified in several fish species (Jin et al., 2007; Xiao et  
370 al., 2010; Wang and Secombes, 2008; Studzinski et al., 2009) and their expression may be  
371 induced by cytokines in fish as in mammals (Wang and Secombes, 2008). In the present study  
372 *SOCS* gene expression was affected by the feeding regime (Fig 4). The higher expression of the  
373 *SOCS* genes in FU fish than in FF fish in June coincided with a reduced expression of *IGF-I* in  
374 FU fish (Fig. 3 C). This situation closely resembles the reduced *IGF-I* expression seen in fasted  
375 salmonid fish, as a result of downregulated hepatic GH signalling (Björnsson, 1997), and that in  
376 homozygotic GH transgenic zebrafish (*Danio rerio*), in which *SOCS1* and *SOCS3* seemed to be  
377 responsible for the downregulation of GH signalling in the liver (Studzinski et al., 2009). In  
378 common with the elevated plasma GH concentration in fasting salmonids (Björnsson, 1997), GH  
379 transgenic zebrafish overexpress GH in comparison with their hemizygotic counterparts  
380 (Figueiredo et al., 2007).

381 It is interesting to note that liver IGF-I expression in the FU fish used in our study only  
382 decreased during the latter part of the enforced fasting period (i.e. from May onwards), despite  
383 the fact that the fish most likely had been fasting voluntarily for months when sampled in May.  
384 This resembles the situation seen in seasonal mammals, which differ in their responses when  
385 undergoing seasonal winter weight loss and when they are subjected to feed deprivation during  
386 summer (Adam and Mercer, 2004). The reduction in liver *IGF-I* expression with fasting seen in  
387 the present study (Fig. 3 C) was probably not a direct result of the increase in *Lep* expression  
388 since *in vitro* Lep treatment did not affect liver IGF-I expression (Fig. 5 F), but more likely  
389 related to the elevated *SOCS1* and *SOCS3* expression (Fig. 4 A,C). This would comply with the



390 results obtained with GH-transgenic zebrafish, which indicated that reduced GH signalling was  
391 caused by SOCS1 and SOCS3 (Studzinski et al., 2009).

392 The present study showed that Lep stimulated hepatic *SOCS1* and *SOCS3* gene expression  
393 *in vitro* (Fig. 5 A,C). This result provides evidence for a link between the higher liver *LepA1* and  
394 *LepA2* expression in FU fish than in FF fish in June (Fig. 3 A,B) and the corresponding  
395 difference in liver *SOCS1* and *SOCS3* gene expression in FU and FF fish (Fig. 4 A, C). The  
396 higher liver *SOCS2* expression in FU fish than in FF fish in June was probably not caused by  
397 Lep, which did not affect *SOCS2* expression in the *in vitro* experiment (Fig. 5B). Another  
398 candidate could be cortisol, which was recently shown to stimulate *SOCS2* expression in rainbow  
399 trout hepatocytes *in vitro* (Philip et al., 2012). However, we did not find differences in plasma  
400 cortisol concentrations between FU and FF fish in June (Table 2), even though the FU fish may  
401 have been suffering from starvation stress during the latter part of the fasting period.

402  
403 In summary, the present study has revealed a metabolic suppression in anadromous Arctic charr  
404 subjected to fasting after they had entered their natural summer feeding period. Upregulated *Lep*  
405 and *SOCS* genes and downregulated *IGF-I* expression in the liver are suggested to be a part of the  
406 mechanisms that suppress lipolytic pathways and depress metabolism when fat stores are  
407 depleted. We have demonstrated that Lep stimulated hepatic *SOCS1* and *SOCS3* expression *in*  
408 *vitro*, and this stimulation may be responsible for downregulation of GH signalling and,  
409 consequently, reduced *IGF-I* expression in the liver. Further studies are needed to elucidate how  
410 Lep and SOCS interact to regulate intermediary metabolism in fish that display seasonal feeding  
411 cycles.

412

413 **Acknowledgement**

414  
415 We like to thank the staff at Tromsø Aquaculture Research Station for excellent care of the fish,  
416 Fredrikke Musæus for help with fat extraction and sampling, Tanja Hanebrekke for help with the  
417 cortisol analyses and Birgit Süßenbach for help during the analyses of liver enzyme activity. We  
418 also thank Björn Thrandur Björnsson’s Fish Endocrinology lab, University of Gothenburg for  
419 help in producing the trout recombinant leptin. Parts of the work reported here were submitted  
420 by Mads Martinsen and Vidar Strøm as partial requirement for the awarding of the degree in  
421 Master of Fisheries Sciences, University of Tromsø. Financial support was provided by Tromsø  
422 Research Foundation, University of Tromsø.

423

## 424 **References**

425

426 **Aarseth, J. J., Frøiland, E. and Jørgensen, E. H.** (2010). Melatonin implantation during spring  
427 and summer does not affect seasonal rhythms of feeding and maturation in anadromous Arctic  
428 charr (*Salvelinus alpinus*). *J. Polar Biol.* **33**, 379-388.

429

430 **Aas-Hansen, Ø., Vijayan, M. M., Johnsen, H. K., Cameron, C. and Jørgensen, E. H.** (2005).  
431 Re-smoltification in wild, anadromous Arctic char (*Salvelinus alpinus*): a survey of  
432 osmoregulatory, metabolic and endocrine changes preceding annual seawater migration. *Can. J.*  
433 *Fish. Aquat. Sci.* **62**, 195-204.

434

435 **Adam, C. L., and Mercer, G.** (2004). Appetite regulation and seasonality: implications for  
436 obesity. *Proc. Nutr. Soc.* **63**, 413-419.

437

438 **Bastrop, R., Jürss, K. and Wacke, R.** (1992). Biochemical parameters as a measure of food  
439 availability and growth in immature rainbow trout (*Oncorhynchus mykiss*). *Comp. Biochem.*  
440 *Physiol.* **102**, 151-161.

441  
442 **Björnsson, B. T.** (1997). The biology of salmon growth hormone: from daylight to dominance.  
443 *Fish Physiol. Biochem.* **17**, 9–24.

444  
445 **Boivin T. G. and Power, G.** (1990). Winter condition and proximate composition of  
446 anadromous Arctic charr (*Salvelinus alpinus*) in eastern Ungava Bay, Quebec. *Can. J. Zool.* **68**,  
447 2284–2289.

448  
449 **Bottengård, L. and Jørgensen, E. H.** (2008). Elevated spring temperature stimulates growth,  
450 but not smolt development, in anadromous Arctic charr (*Salvelinus alpinus*). *Comp. Biochem.*  
451 *Physiol.* **151**, 596-601.

452  
453 **Dutil, J.-D.** (1986). Energetic constraints and spawning interval in the anadromous Arctic charr  
454 (*Salvelinus alpinus*). *Copeia* **4**, 945-955.

455  
456 **Figueiredo, M. A., Lanes, C. F. C., Almeida, D. V., Proietti, M. C. and Marins, L. F.** (2007).  
457 The effect of GH overexpression on GHR and IGF-I gene regulation in different genotypes of  
458 GH-transgenic zebrafish. *Comp. Biochem. Physiol.* **D 2**, 228–233

459

460 **Foster, G. D. and Moon, T. W.** (1991). Hypometabolism with fasting in the yellow perch  
461 (*Perca flavescens*): A study of enzymes, hepatocyte metabolism, and tissue size. *Physiol. Zool.*  
462 **64**, 259-275.

463  
464 **Frøiland, E., Murashita, K., Jørgensen, E. H. and Kurokawa, T.** (2010). Leptin and ghrelin in  
465 anadromous Arctic charr: cloning and change in expressions during a seasonal feeding cycle.  
466 *Gen. Comp. Endocrinol.* **165**, 136-143.

467  
468 **Frøiland, E., Jobling, M., Björnsson, B. T., Kling, P., Ravuri, C. and Jørgensen, E. H.**  
469 (2012). Seasonal appetite regulation in the anadromous Arctic charr: evidence for a role of  
470 adiposity in the regulation of appetite but not for leptin in signalling adiposity. *Gen. Comp.*  
471 *Endocrinol.* **178**, 330-337.

472  
473 **Fujimoto, M. and Naka, T.** (2003). Regulation of cytokine signaling by SOCS family  
474 molecules. *Trends Immunol.* **24**, 659-666.

475  
476 **Guppy, M. and Withers, P.** (1999). Metabolic depression in animals: physiological perspectives  
477 and biochemical generalizations. *Biol. Rev. Camb. Philos. Soc.* **74**, 1-40.

478  
479 **Huising, M. O., Geven, E. J. W., Kruiswijk, C. P., Nabuurs, S. B., Stolte, E. H., Tom**  
480 **Spanings, F. A., Verburg-van Kemenade, B. M. and Flik, G.** (2006). Increased leptin  
481 expression in common carp (*Cyprinus carpio*) after food intake but not after fasting or feeding to  
482 satiation. *Endocrinology* **147**, 5786–5797.

483

484 **Jin, H.-J., Xiang, L.-X. and Shao, J.-Z.** (2007). Identification and characterization of  
485 suppressor of cytokine signalling 1 (SOCS-1) homologues in teleost fish. *Immunogen.* **59**, 673-  
486 686.

487  
488 **Jensen, A. J., Finstad, B., Fiske, P., Hvidsten, N. A., Rikardsen, A. H. and Saksgård, L.**  
489 (2012). Timing of smolt migration in sympatric populations of Atlantic salmon (*Salmo salar*),  
490 brown trout (*Salmo trutta*), and Arctic char (*Salvelinus alpinus*). *Can. J. Fish. Aquat. Sci.* **69**,  
491 711–723.

492  
493 **Jobling, M., Johansen, J. S., Foshaug, H., Burkow, I. C. and Jørgensen, E. H.** (1998). Lipid  
494 dynamics in anadromous Arctic charr, *Salvelinus alpinus* (L.): seasonal variations in lipid storage  
495 depots and lipid class composition. *Fish Physiol. Biochem.* **18**, 225-240.

496  
497 **Johansen, S. J. S., Ekli, M. and Jobling, M.** (2002). Is there lipostatic regulation of feed intake  
498 in Atlantic salmon *Salmo salar* L.? *Aquacult. Res.* **33**, 515–524.

499  
500 **Jørgensen, E. H. Johansen, S. J. S. and Jobling, M.** (1997). Seasonal patterns of growth, lipid  
501 deposition and depletion in anadromous Arctic charr. *J. Fish Biol.* **51**, 312-326.

502  
503 **Keppler, D. and Decker, K.** (1974). Glycogen: Determination with amyloglucosidase. In  
504 *Methods of Enzymatic Analysis* (ed. H.-U. Bergmeyer), pp.1127–1131. Weinheim: Verlag  
505 Chemie.

506

507 **Kling, P., Jönsson, E., Nilsen, T. O., Einarsdottir, I. E., Rønnestad, I., Stefansson, S. O. and**  
508 **Björnsson, B. Th.** (2012). The role of growth hormone in growth, lipid homeostasis, energy  
509 utilization and partitioning in rainbow trout: Interactions with leptin, ghrelin and insulin-like  
510 growth factor I. *Gen. Comp. Endocrinol.* **75**, 153-162.

511  
512 **Kurokawa, T., Susumu, U. and Suzuki, T.** (2005). Identification of cDNA coding for a  
513 homologue to mammalian leptin from pufferfish *Takifugu rubripes*. *Peptides* **26**, 745–750.

514  
515 **Kurokawa, T. and Murashita, K.** (2009). Genomic characterization of multiple leptin genes  
516 and a leptin receptor gene in the Japanese medaka, *Oryzias latipes*. *Gen. Comp. Endocrinol.* **161**,  
517 229-237.

518  
519 **Liu, Q., Chen, Y., Copeland, D., Ball, H., Duff, R. J., Rockich, B. and Londraville, R. L.**  
520 (2010). Expression of leptin receptor gene in developing and adult zebrafish. *Gen. Comp.*  
521 *Endocrinol.* **166**, 346-355.

522  
523 **Livak, K. J. and Schmittgen, T. D.** (2001). Analysis of relative gene expression data using  
524 realtime quantitative PCR and the 2(-Delta Delta C(T)) method. *Methods* **25**, 402–408.

525  
526 **Lu, R.-H., Liang, X.-F., Wang, M., Zhou, Y., Bai, X.-L., He, Y.** 2012. The role of leptin in  
527 lipid metabolism in fatty degenerated hepatocytes of the grass carp *Ctenopharyngodon idellus*.  
528 *Fish Physiol. Biochem.* **38**,1759–1774.

529

- 530 **Masuzaki, M., Ogawa, Y., Isse, N., Satoh, N., Okazaki, T., Shigemoto, M., Mori, K.,**  
531 **Tamura, N., Hosoda, K., Yoshimasa, Y. et al.** (1995). Human obese gene expression.  
532 Adipocyte-specific expression and regional differences in the adipose tissue. *Diabetes* **44**, 855–  
533 858.
- 534
- 535 **Mommsen, T. P., Vijayan, M. M. and Moon, T. W.** (1999). Cortisol in teleosts: dynamic,  
536 mechanisms of action, and metabolic regulation. *Rev. Fish Biol. Fish.* **9**, 211–268.
- 537
- 538 **Murashita, K., Susumu, U., Yamamoto, T., Rønnestad, I., Kurokawa, T.** (2008). Production  
539 of recombinant leptin and its effect on food intake in rainbow trout (*Oncorhynchus mykiss*),  
540 *Comp. Biochem. Physiol.* **150**, 377–384.
- 541
- 542 **Navarro, I., Gutiérrez, J. and Planas, J.** 1992. Changes in plasma glucagon, insulin and tissue  
543 metabolites associated with prolonged fasting in brown trout (*Salmo trutta fario*) during the  
544 different seasons of the year. *Comp. Biochem. Physiol.* **102**, 401-407.
- 545
- 546 **Navarro, I. and Gutiérrez, J.** (1995). Fasting and starvation. In *Metabolic Biochemistry* (ed. P.  
547 W. Hochachka and T. P. Mommsen), pp. 393-434. Amsterdam: Elsevier Science B.V.
- 548
- 549 **Nilssen, K. J., Gulseth, O. A., Iversen, M., and Kjøl, R.** (1997). Summer osmoregulatory  
550 capacity of the world's northernmost living salmonid. *Am. J. Physiol.* **41**, R743-R749.
- 551

552 **Philip, A. M., Daniel Kim, S. and Vijayan, M. M.** (2012). Cortisol modulates the expression of  
553 cytokines and suppressors of cytokine signaling (SOCS) in rainbow trout hepatocytes. *Dev.*  
554 *Comp. Immunol.* **38**, 360-367.

555  
556 **Polakof, S., Panserat, S., Soengas, J. L. and Moon, T. W.** (2012). Glucose metabolism in fish:  
557 a review. *J. Comp. Physiol.* **182**, 1015-1045.

558  
559 **Rønnestad, I., Nilsen, T. O., Murashita, K., Angotzi, A. R., Gamst Moen, A.-E., Stefansson,**  
560 **S. O., Kling, P., Björnsson, B. Th. and Kurokawa, T.** (2010). Leptin and leptin receptor genes  
561 in Atlantic salmon: cloning, phylogeny, tissue distribution and expression correlated to long-term  
562 feeding status. *Gen. Comp. Endocrinol.* **168**, 55–70.

563  
564 **Schulz, R.** (1985). Measurements of five androgens in the blood of immature and mature  
565 rainbow trout, *Salmo gairdneri* (Richardson). *Steroids* **46**, 717–726.

566  
567 **Studzinski, A. L. M., Almeida, D. V., Lanes, C. F. C., Figueiredo, M. A. and Marins, L. F.**  
568 (2009). SOCS1 and SOCS3 are the main negative modulators of the somatotrophic axis in liver  
569 of homozygous GH-transgenic zebrafish (*Danio rerio*). *Gen. Comp. Endocrinol.* **161**, 67-72.

570  
571 **Tinoco, A. B., Nisembaum, L. G., Isorna, E., Delgado, M. J. and de Pedro, N.** (2012). Leptins  
572 and leptin receptor expression in the goldfish (*Carassius auratus*): Regulation by food intake and  
573 fasting/overfeeding conditions. *Peptides* **34**, 329-335.

574



575 **Trombley, S., Maugars, G., Kling, P., Björnsson, B. Th. and Schmitz, M.** (2012). Effects of  
576 longterm restricted feeding on plasma leptin, hepatic leptin expression and leptin receptor  
577 expression in juvenile Atlantic salmon (*Salmo salar* L.), *Gen. Comp. Endocrinol.* **175**, 92–99.

578  
579 **Tveiten, H., Johnsen, H. K., and Jobling, M.** (1996). Influence of maturity status on the annual  
580 cycles of feeding and growth in Arctic charr reared at constant temperature. *J. Fish Biol.* **48**, 910-  
581 924.

582  
583 **Tveiten, H., Mayer, I., Johnsen, H. K., Jobling, M.** (1998). Sex steroids, growth and condition  
584 of Arctic charr broodstock during an annual cycle. *J. Fish Biol.* **53**, 714-727.

585  
586 **Tveiten, H., Bjørn, P. A., Johnsen, H. K., Finstad, B., McKinley, R. S.** (2010). Effects of the  
587 sea louse *Lepeophtheirus salmonis* on temporal changes in cortisol, sex steroids, growth and  
588 reproductive investment in Arctic charr *Salvelinus alpinus*. *J. Fish Biol.* **76**, 2318-2341.

589  
590 **Wang, T. and Secombes, C. J.** (2008). Rainbow trout suppressor of cytokine signalling (SOCS)  
591 1, 2 and 3: Molecular identification, expression and modulation. *Mol. Immunol.* **45**, 1449-1457.

592  
593 **Won, E. T., Baltzegar, D. A., Picha, M. E. and Borski, R. J.** (2012). Cloning and  
594 characterization of leptin in Perciform fish, the striped bass (*Morone saxatilis*): Control of  
595 feeding and regulation of nutritional state. *Gen. Comp. Endocrinol.* **178**, 98-107.

596

597 **Wong, M. M. L., Yu, R. M. K., Ng, P. K. S., Law, S. H. W., Tsang, A. K. C. and Kong, R. Y.**  
598 **C. (2007).** Characterization of a hypoxi-responsive leptin receptor (omLepR<sub>L</sub>) from the marine  
599 medaka (*Oryzias melastigma*). *Mar. Poll. Bull.* **54**, 797-803.

600

601 **Xiao, Z.-G., Liu, H., Fu, J.-P., Hu, W., Wang, Y.-P. and Guo, Q.-L.** 2010. Cloning of  
602 common carp SOCS-3 gene and its expression during embryogenesis, GH-transgene and viral  
603 infection. *Fish Shellfish Immunol.* **28**, 362-371.

604  
605  
606  
607  
608  
609  
610  
611  
612  
613  
614  
615  
616  
617  
618  
619  
620  
621  
622  
623  
624  
625  
626  
627  
628  
629  
630  
631  
632  
633  
634  
635  
636  
637  
638  
639  
640

**Table legends**

Table 1. Nucleotide sequences used in the qPCR analyses and accession numbers of the gene sequences they were constructed from.

Table 2. Mean  $\pm$  s.e.m. hepatosomatic index (HSI, %), liver glycogen concentrations ( $\mu\text{mol} \cdot \text{g protein}^{-1}$ ) and enzyme activities ( $\mu\text{mol} \cdot \text{min}^{-1} \cdot \text{g protein}^{-1}$ ) in fed and fasted Arctic charr. n denotes the number of fish analyzed and different letters indicate values that are significantly different.

**Figure legends**

Figure 1. Temporal changes in mean ( $\pm$  s.e.m.) body mass (A), condition factor (B), body protein (C) and fat (D) concentrations, and plasma cortisol (E) and glucose (F) concentrations in fed and fasted anadromous Arctic charr. Different letters denote significant differences between groups.

Figure 2. Temporal change in weights of body protein (bottom column, P) and fat (top column, F) of the fed (FF) (A) and fasted (FU) (B) fish sampled in June. Body fat and protein mass in March and May were calculated from the BM in March and May of the fish sampled in June, and the data for percentage of body fat and protein of the fish sampled in March and May (see Appendix, Table 2 for more information).

Figure 3. Temporal changes in mean ( $\pm$  s.e.m.) liver *leptinA1* (A), *leptinA2* (B) and *IGF-I* (C) gene expressions in fed and fasted anadromous Arctic charr. Different letters denote significant differences between groups.

Figure 4. Temporal changes in *SOCS1* (A), *SOCS2* (B) and *SOCS3* (C) gene expressions in liver of fed and fasted Arctic charr. Different letters denote significant differences between groups.

Figure 5. *In vitro* effects of recombinant trout leptin on *SOCS1*, *SOCS2*, *SOCS3*, *G6PDH*, *AspAT* and *IGF-I* mRNA expressions in liver slices from Arctic charr. Each column represents one liver slice. Asterisks denote those genes for which the expression was significantly different from that in the leptin treated group.

641 Table 1.

642

643

644

645

646

647

648

649

650

651

652

653

654

655

656

657

658

659

660

661

662

663

664

665

666

667

668

| Gene symbol                     | Gene Name                                      | Accession number | Primer Sequences                                                       |
|---------------------------------|------------------------------------------------|------------------|------------------------------------------------------------------------|
| <i>LepA1</i>                    | <i>Leptin A1</i>                               | JQ615967         | F: TCC TAG ACT GGG CAG ACC T<br>R: GCC TGG GCA GCG TGA TAT             |
| <i>LepA2</i>                    | <i>Leptin A2</i>                               | AB490667         | F: TGG CAC TAA ACA GAC TCA AGG<br>R: CTC AGT GAT GAT CTA TGT CAG TAA C |
| <i><math>\beta</math>-Actin</i> | <i>Beta Actin</i>                              | AF503211         | F: GCC CCC CTG AAC CCC<br>R: GAA GGT CTC AAA CAT AAT CTG GGT C         |
| <i>EF1<math>\alpha</math></i>   | <i>Elongation Factor</i>                       | AF498320         | F: AGG CAT TGA CAA GAG AAC CATT<br>R: TGA TAC CAC GCT CCC TCT C        |
| <i>SOCS1</i>                    | <i>Suppressor of cytokine signalling 1</i>     | NM_001146166     | F: TCA GCG TAC GCA TCG TCT AT<br>R: CGG TCA GGC TTT TCT TAG AGG        |
| <i>SOCS2</i>                    | <i>Suppressor of cytokine signalling 2</i>     | AM748722.1       | F: TCG GAT GAC TTT TGG CCT AC<br>R: CCG TTC TTC TCT CGT TTT CG         |
| <i>SOCS3</i>                    | <i>Suppressor of cytokine signalling 3</i>     | AM748723         | F: ACC TCT GAC GAA GCA CAC AT<br>R: GCT GTA ATG GTT GAA TGG ATA GGA    |
| <i>IGF-1</i>                    | <i>Insulin-like growth factor 1</i>            | M95183           | F: TGG ACA CGC TGC AGT TTG TGT GT<br>R: CAC TCG TCC ACA ATA CCA CGG T  |
| <i>AspAT</i>                    | <i>Aspartate aminotransferase, cytoplasmic</i> | NM_001141739     | F: TCC TTT CCT CAT CTC CTT CAT TAC<br>R: TTT CCT TGT GTC CTT CCC TCT   |
| <i>G6PDH</i>                    | <i>Glucose-6-phosphate dehydrogenase</i>       | EF551311.1       | F: CAC TAC CTG GGC AAG GAG AT<br>R: TTG CTC ATC ATC TTG GCG TA         |

669 Table 2

670  
671  
672  
673

| Liver    | March 25                  |                           | May 6                     | June 17                  |                          |
|----------|---------------------------|---------------------------|---------------------------|--------------------------|--------------------------|
|          | Fed (n=9)                 | Fasted (n=10)             | Fasted (n=10)             | Fed (n=7)                | Fasted (n=10)            |
| HSI      | 1.2 ± 0.06 <sup>a</sup>   | 1.2 ± 0.07 <sup>a</sup>   | 1.1 ± 0.02 <sup>ab</sup>  | 2.0 ± 0.12 <sup>c</sup>  | 1.0 ± 0.04 <sup>b</sup>  |
| Glycogen | 12.6 ± 1.6 <sup>a</sup>   | 15.0 ± 2.2 <sup>a</sup>   | 11.5 ± 1.2 <sup>a</sup>   | 28.2 ± 4.7 <sup>b</sup>  | 1.8 ± 0.5 <sup>c</sup>   |
| Ala-AT   | 20.0 ± 1.6                | 21.6 ± 2.0                | 21.8 ± 1.6                | 20.7 ± 2.1               | 18.6 ± 1.5               |
| Asp-AT   | 12.5 ± 1.3 <sup>ab</sup>  | 10.3 ± 0.6 <sup>ac</sup>  | 10.1 ± 0.7 <sup>ac</sup>  | 16.4 ± 2.3 <sup>b</sup>  | 8.3 ± 0.7 <sup>c</sup>   |
| G6PDH    | 4.1 ± 0.3 <sup>a</sup>    | 5.2 ± 0.4 <sup>a</sup>    | 3.9 ± 0.3 <sup>a</sup>    | 15.0 ± 2.3 <sup>b</sup>  | 2.5 ± 0.3 <sup>c</sup>   |
| LDH      | 45.5 ± 2.5 <sup>a</sup>   | 51.4 ± 4.1 <sup>a</sup>   | 49.6 ± 1.4 <sup>a</sup>   | 68.2 ± 6.9 <sup>b</sup>  | 35.3 ± 2.0 <sup>c</sup>  |
| HOAD     | 0.47 ± 0.02 <sup>a</sup>  | 0.48 ± 0.02 <sup>a</sup>  | 0.45 ± 0.01 <sup>a</sup>  | 0.76 ± 0.1 <sup>b</sup>  | 0.33 ± 0.03 <sup>c</sup> |
| PEPCK    | 0.18 ± 0.02 <sup>a</sup>  | 0.19 ± 0.02 <sup>ab</sup> | 0.19 ± 0.02 <sup>ab</sup> | 0.27 ± 0.04 <sup>b</sup> | 0.16 ± 0.02 <sup>a</sup> |
| PK       | 0.70 ± 0.06 <sup>ab</sup> | 0.78 ± 0.07 <sup>ab</sup> | 0.91 ± 0.05 <sup>a</sup>  | 1.13 ± 0.16 <sup>a</sup> | 0.61 ± 0.08 <sup>b</sup> |

674  
675  
676  
677  
678  
679  
680  
681  
682  
683  
684  
685  
686  
687  
688

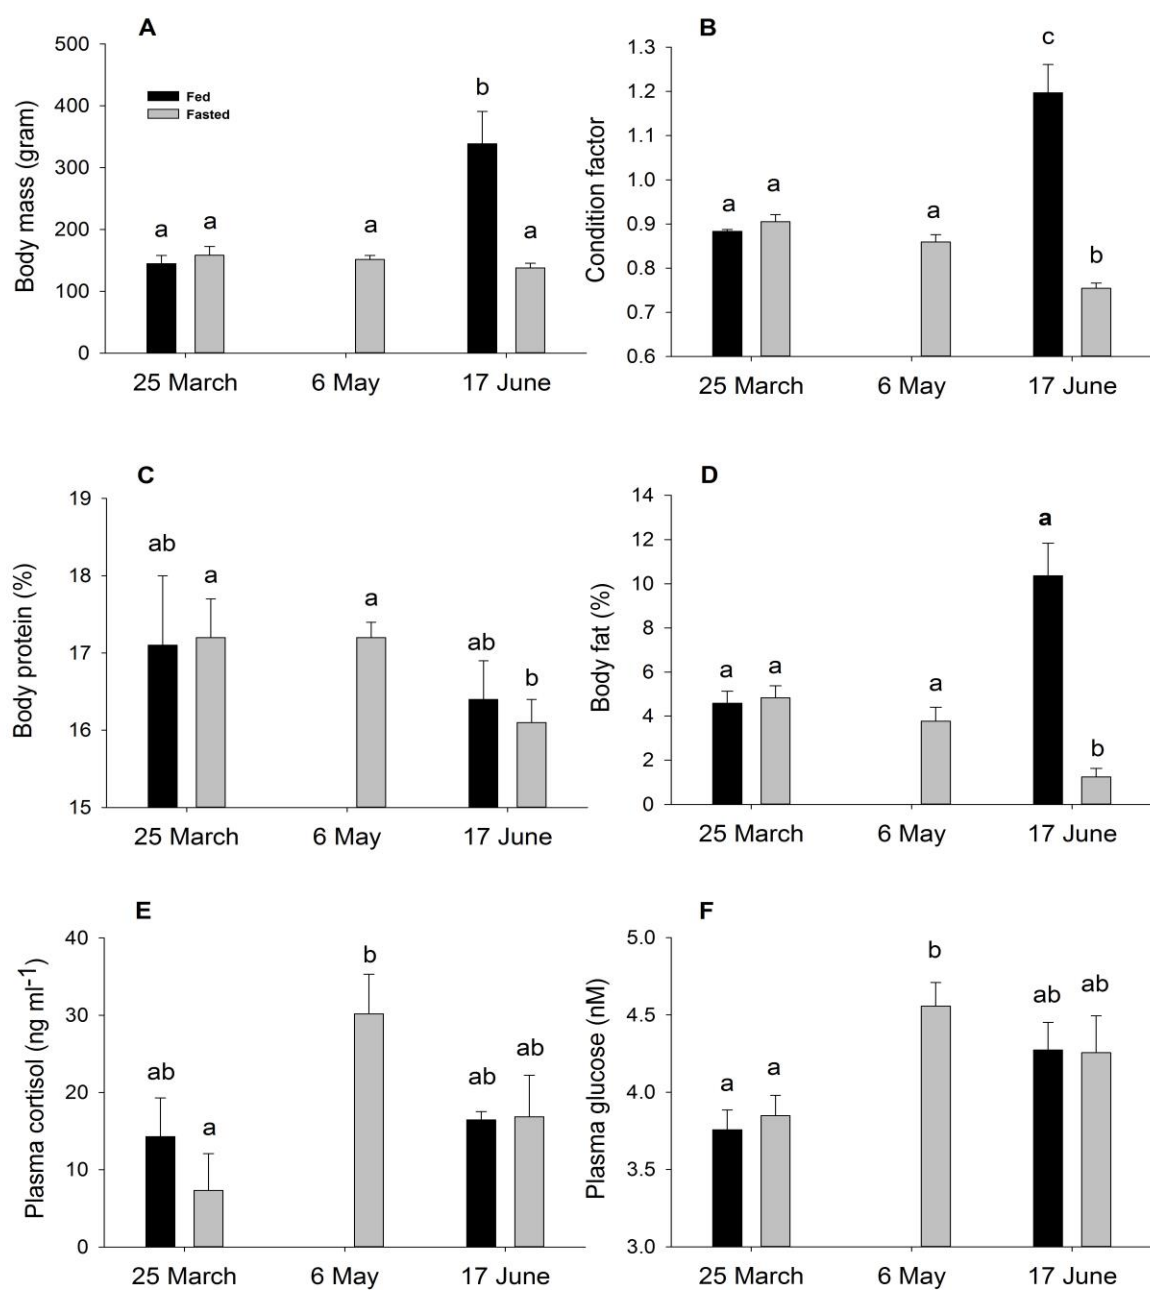

689

690 Fig. 1

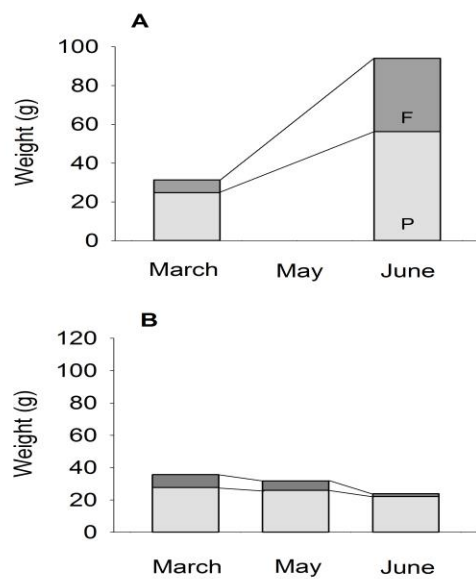

691

692

693 Fig. 2

694

695

696

697

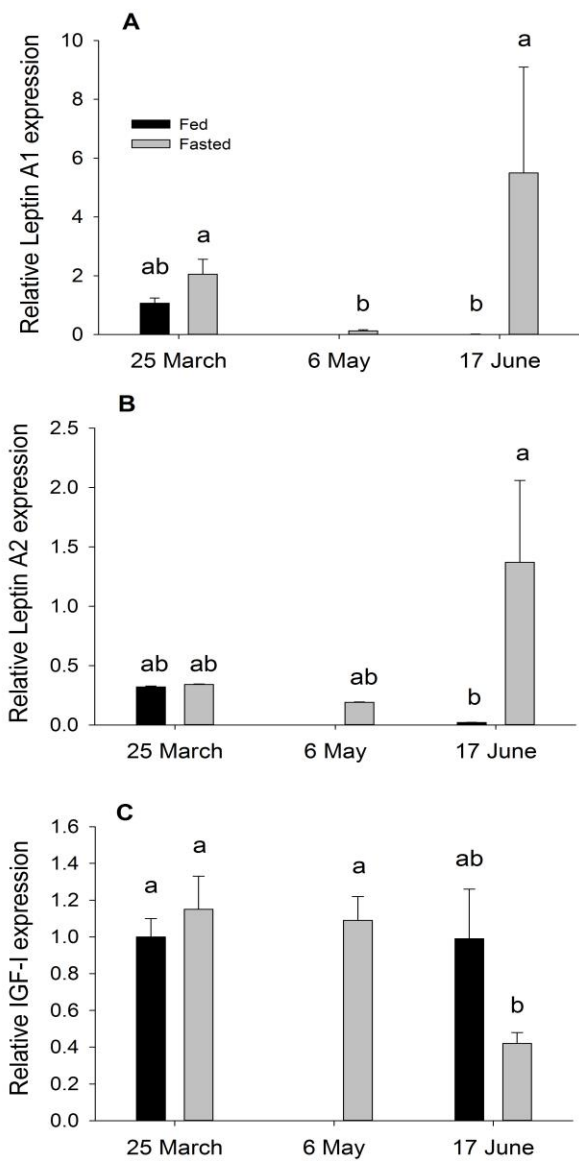

698

699

700 Fig. 3



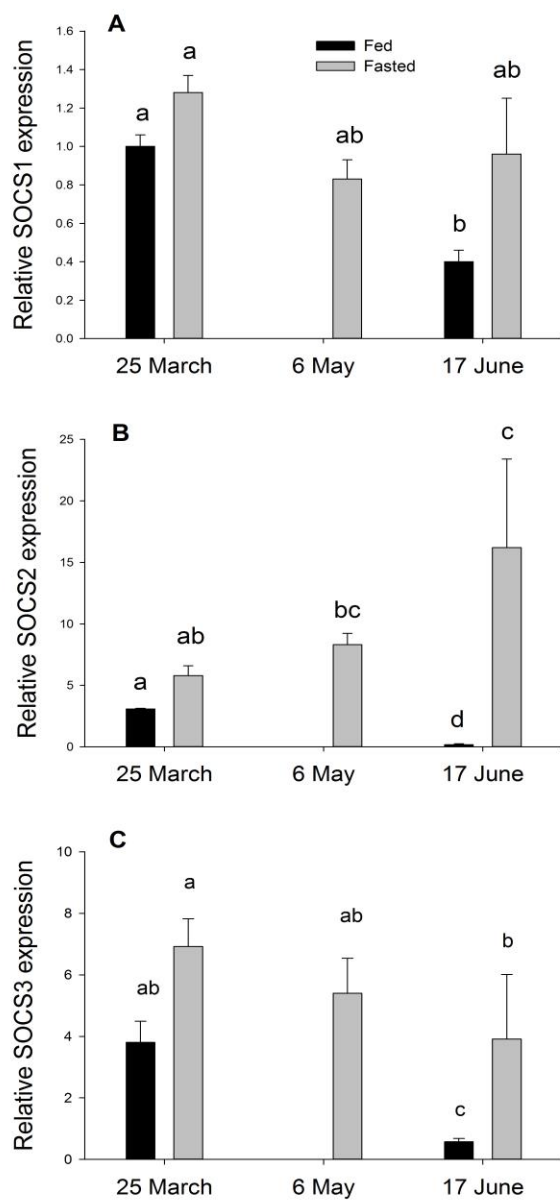

701

702 Fig. 4

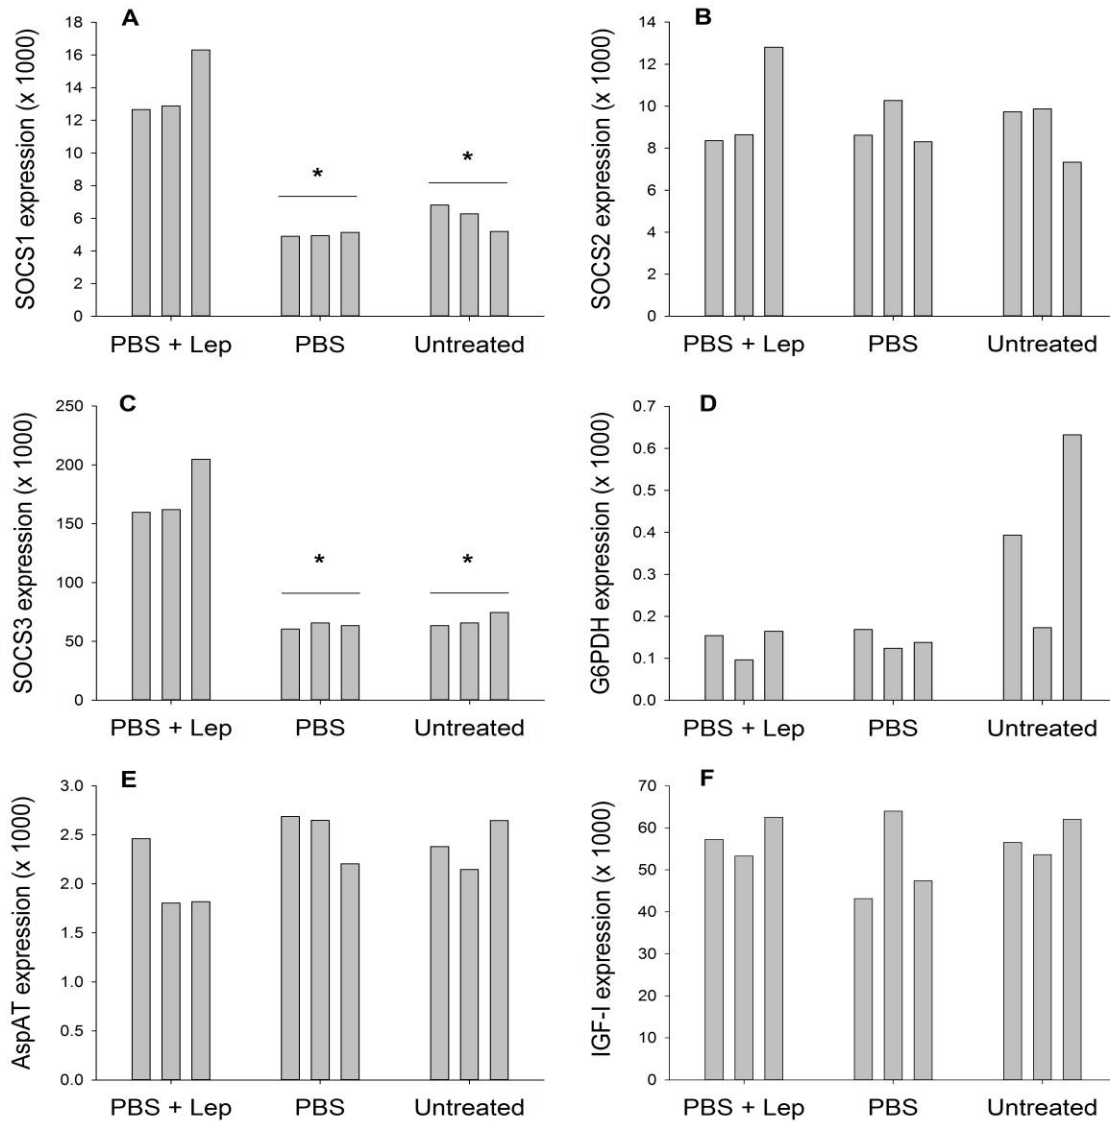

703

704 Fig. 5

705
